# Supplementary material for: Histoplasma yeast and mycelial transcriptomes reveal pathogenic-phase and lineage-specific gene expression profiles
Source: PubMed Central journal article supplement (PMC3852720; doi:10.1186/1471-2164-14-695), 2013-10-10
Supplement: 1471-2164-14-695-S1.pdf [file 1471-2164-14-695-S1.pdf]

**A. G186A**

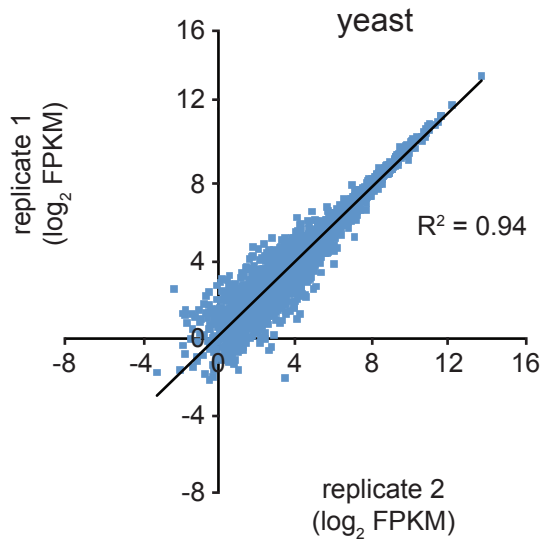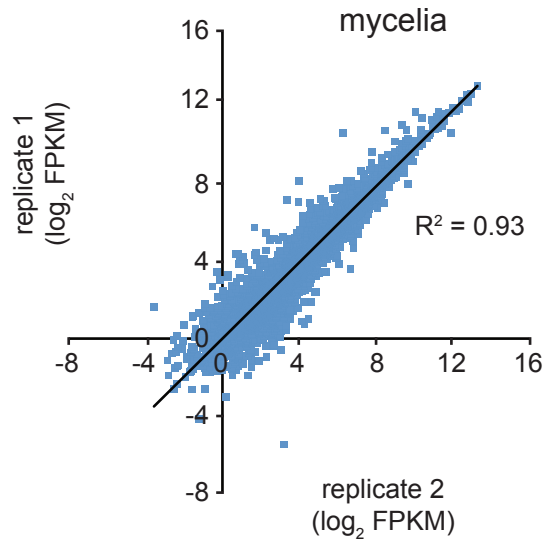

**B. G217B**

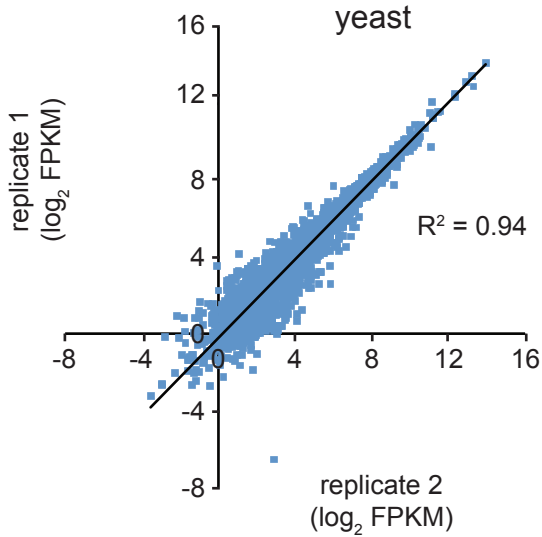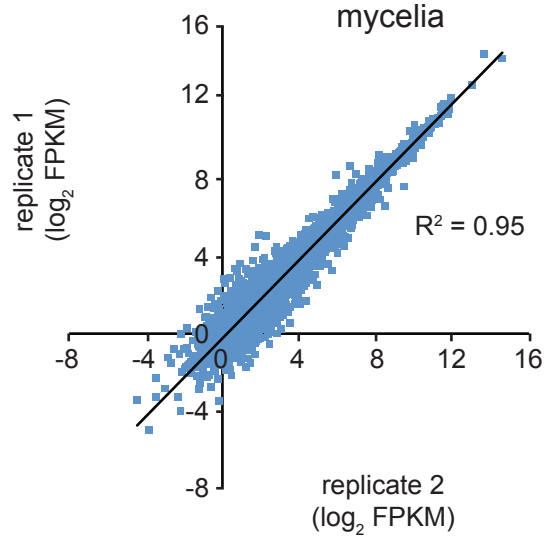

**Supplementary Figure 1. Correlation of gene expression levels between biological replicate yeast and mycelial samples.** Gene expression levels (FPKM values) were determined for G186A (**A**) and G217B (**B**). Data represents the FPKM value for individual gene expression in two biological replicated samples of yeast mRNA (left panels) and mycelial mRNA (right panels). Correlation between samples ( $R^2$ ) is indicated on each graph. Diagonal line represents equivalent expression between samples.
