# Supplementary material for: Histoplasma yeast and mycelial transcriptomes reveal pathogenic-phase and lineage-specific gene expression profiles
Source: Springer Nature journal article supplement (doi:10.1186/1471-2164-14-695), 2013-10-10
Supplement: 12864_2013_5421_MOESM11_ESM.pdf [file 12864_2013_5421_MOESM11_ESM.pdf]

**A. G186A**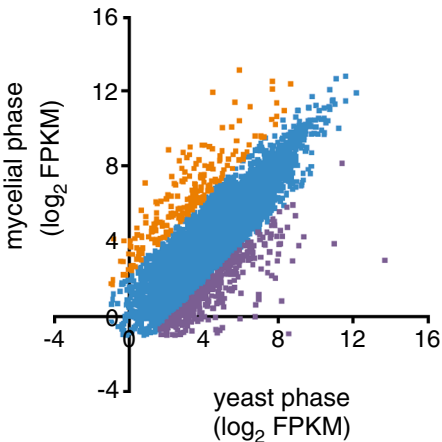**B. G217B**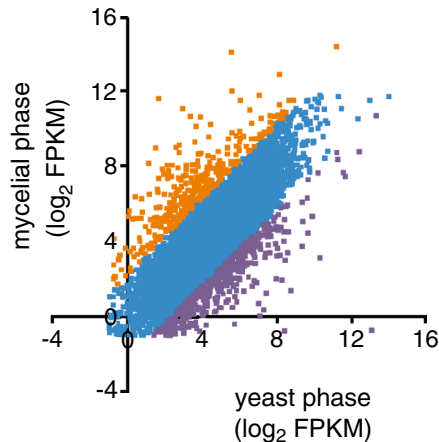

■ 5-fold increased expression in mycelia

■ similar expression

■ 5-fold increased expression in yeast
