# Supplementary material for: Histoplasma yeast and mycelial transcriptomes reveal pathogenic-phase and lineage-specific gene expression profiles
Source: Springer Nature journal article supplement (doi:10.1186/1471-2164-14-695), 2013-10-10

**A.**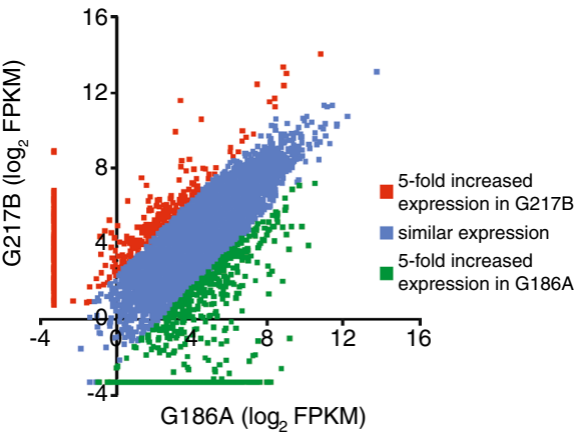**B.**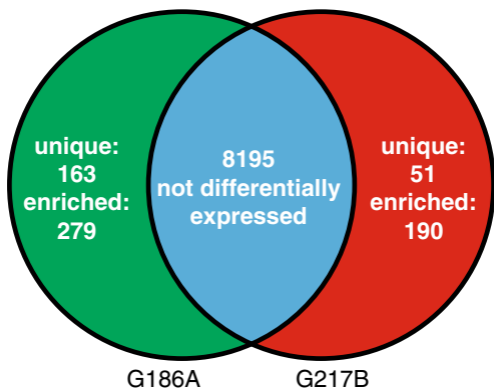

Supplement: 12864_2013_5421_MOESM12_ESM.pdf [file 12864_2013_5421_MOESM12_ESM.pdf]
