# Supplementary material for: Histoplasma yeast and mycelial transcriptomes reveal pathogenic-phase and lineage-specific gene expression profiles
Source: Springer Nature journal article supplement (doi:10.1186/1471-2164-14-695), 2013-10-10
Supplement: 12864_2013_5421_MOESM13_ESM.pdf [file 12864_2013_5421_MOESM13_ESM.pdf]

**A. G186A**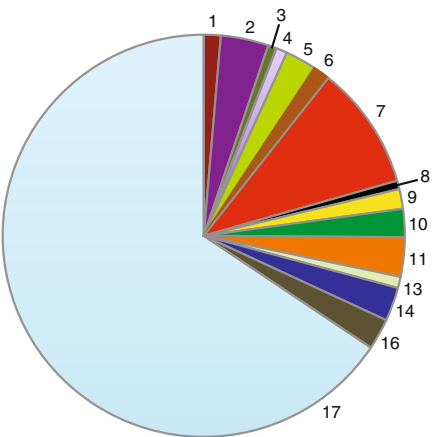**B. G217B**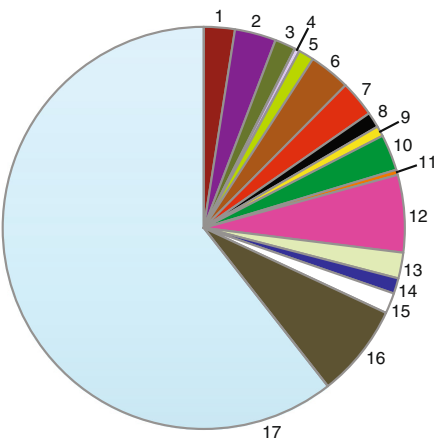

- 1. amino acid transport and metabolism
- 2. carbon transport and metabolism
- 3. glycan metabolism
- 4. iron metabolism
- 5. lipid / fatty acid metabolism
- 6. oxidoreductase
- 7. kinase / phosphatase
- 8. peptidase / protease
- 9. co-factor and nucleotide processing
- 10. transcription factor
- 11. phosphotransferase
- 12. mitosis and cell cycle
- 13. genetic information processing
- 14. membrane transporter
- 15. stress defense
- 16. other
- 17. hypothetical
