# Supplementary material for: Histoplasma yeast and mycelial transcriptomes reveal pathogenic-phase and lineage-specific gene expression profiles
Source: Springer Nature journal article supplement (doi:10.1186/1471-2164-14-695), 2013-10-10

**A. GFP fluorescence**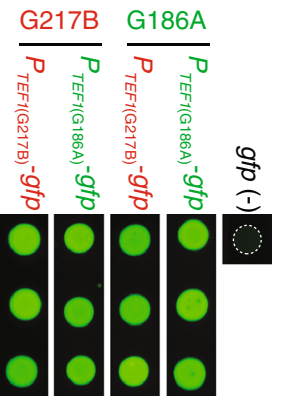**B. *gfp* (-) and *TEF1***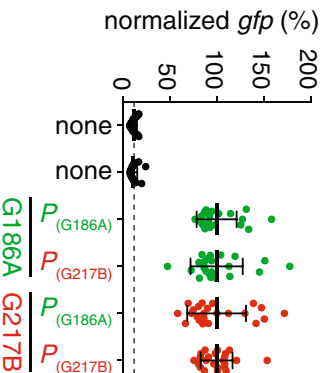**C. *CTR3***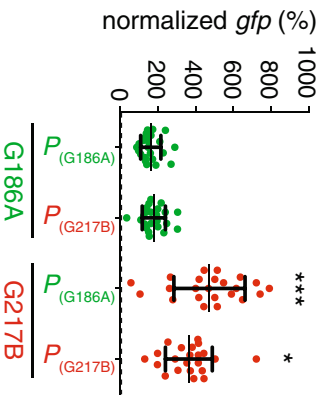**D. *SOD3***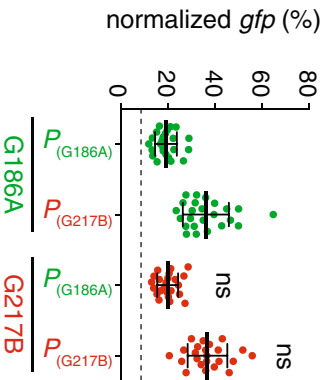**E. *YPS3***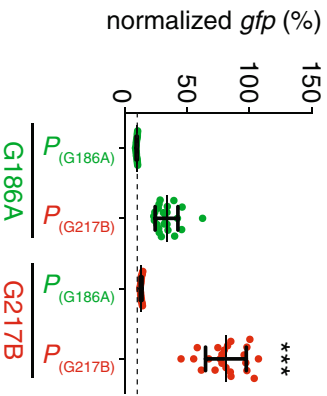**F. *AGS1***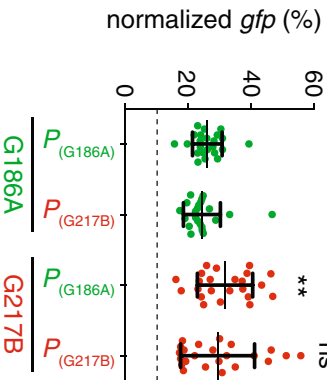**G. *MFS5***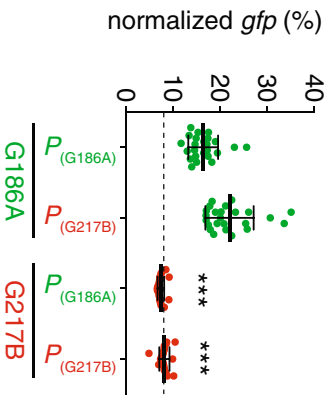**H. *ENV9***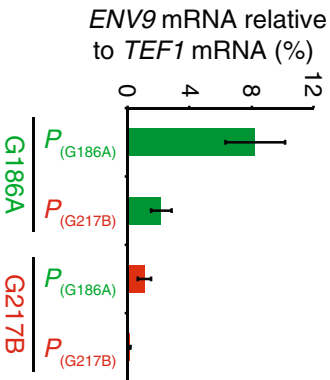

Supplement: 12864_2013_5421_MOESM15_ESM.pdf [file 12864_2013_5421_MOESM15_ESM.pdf]
